# Supplementary material
Source: MDPI journal article supplement (https://www.mdpi.com/1999-4907/14/9/1765)
Supplement: s1 [file s1]

**Table S1.** Specific primers for each gene.

|                | Gene           | ID <i>Pinus pinaster</i> | Sequence (5'–3')      |                        |
|----------------|----------------|--------------------------|-----------------------|------------------------|
|                |                |                          | FORWARD PRIMER        | Reverse Primer         |
| Absciscic acid | <i>NCED3</i>   | PPI00015334              | GAAATGATCAGAGGCGGTTC  | GAGGCATATTTGGGCAGAAG   |
|                | <i>ABCG</i>    | PPI00033391              | GTTACACCTGCTACCACCCC  | GGAGTTGGCGGATGGAAAGA   |
|                | <i>NRT1.2</i>  | PPI00013776              | TGGGCATAGGGTTGGTTATG  | CGAATGGTGTGTAGCAATGG   |
|                | <i>SNRK2.4</i> | PPI00050983              | CACACCCAAGACTCTGACCC  | TAGAACTCCTCCTCTGGCCC   |
|                | <i>ABI1</i>    | PPI00056219              | TGGAGATATGGGCCCAAGGA  | CTTGGCACCAGTGGAGGTAG   |
| Auxins         | <i>PIN1</i>    | PPI00011546              | ACACTTATTCCAGCGCCTTG  | ACCAGCTTCGGCATTGTAAC   |
|                | <i>PP2A</i>    | PPI00008039              | AGACATTCATGGGCAGTTCC  | AATTGGTGTGTCAGGAGCCTTG |
|                | <i>ABP1</i>    | PPI00009705              | AGGATCCGCACATTGGATAC  | AAGGCCCAACACAAGTGAAC   |
|                | <i>TIR1</i>    | PPI00012072              | TAAGCGCTGTATGCATGAGG  | AGGAATGCCAATACGTGCTC   |
|                | <i>ARF7</i>    | PPI00041807              | CAGAAGGTGACTCAGCAGCA  | TTGTGGTTGTGGCTGTGACT   |
|                | <i>AXR1</i>    | PPI00013097              | AAGGCAAAGTGTGTGTGTGC  | GGATTGGTCTCAAGCAAAGC   |
| Cytokinins     | <i>AHK4</i>    | PPI00064460              | AGCAGCGTGGCCATTTATAG  | AAACTGGTCCTGCAACATCC   |
|                | <i>AHP1</i>    | PPI00050577              | TTGCCTCTGTGGATGTTTCAG | TCATCCAGGAATCCCTCTTG   |
|                | <i>CRF2</i>    | PPI00010365              | TCAGCTATGCAGGAAACAGC  | GTTGGGACCAGGCATAATTG   |
| Strigolactones | <i>LBO</i>     | PPI00010339              | CTTTCGTGAACCCAAAGTGG  | CATGTGAGTGGGCATGATTC   |
|                | <i>MAX1</i>    | PPI00016810              | CATTGGTGATCATCGCAGAC  | AGATGGGATGCTCCTGTTTG   |
|                | <i>D14</i>     | PPI00017643              | GCCCTGTATGTTGCCAAAAC  | AGCATGGAACCTTGACTTGC   |
|                | <i>MAX2</i>    | PPI00014698              | ACGGAAAAGCTCCACAGATG  | GCTCCAAGTTTCTGCCATTC   |
| Gibberellins   | <i>GID1</i>    | PPI00071627              | TGGGCGAGATCAAGAGATTC  | CACCGTTTCCTTCTTCTCG    |
|                | <i>GAI</i>     | PPI00014310              | CTTCGCTTGAAGTCCAATCC  | ACACGGTAACGCTTTTGCTC   |
|                | <i>RGA</i>     | PPI00011857              | TTAGCCCATGTTGCACAGAG  | TGAGATATTCCCGGGTCTTG   |
|                | <i>SLY1</i>    | PPI00016475              | ATCTGCAAACCACCCATCTC  | TGCAAGAGATCCCAGAAACC   |
| Sugars         | <i>STP1</i>    | PPI00012920              | AGGGACGTCCAATGTTCAAG  | TGAGGCCGATATTCCTCTG    |
|                | <i>SWEET17</i> | PPI00061954              | GGCCTGAGTTTCAGTTTGG   | ATGTCTTCACGGGTGAGATG   |
|                | <i>WRKY20</i>  | PPI00011874              | ATGGGGAACAAACAGTCTGC  | TCACAAATGGCTAGCACAGG   |
| Li gh          | <i>PHYB</i>    | PPI00062444              | TTGCGGTTTACTCCTTCACC  | AACCACCACCAAGCTGTTTC   |
| Co nst .       | <i>UBI</i>     | AF461687                 | GTCCCGCACTGACAATCTCT  | CTGAGTCCATGCTCTTGCTG   |

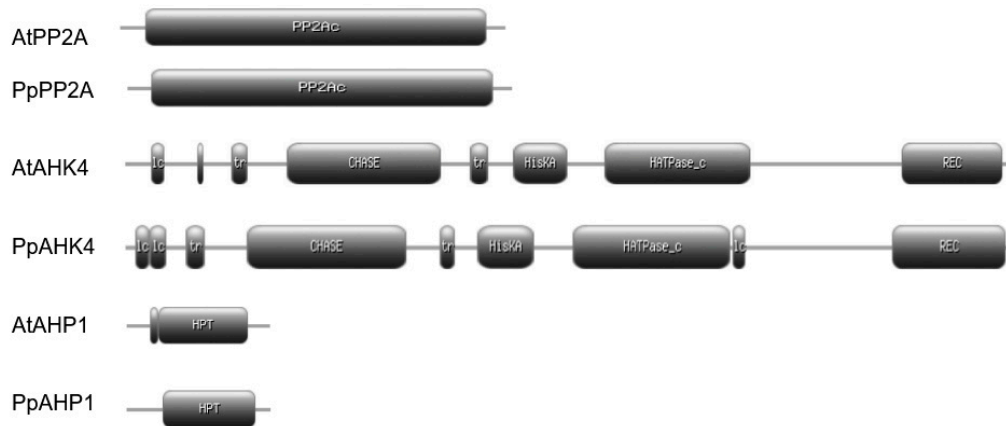

**Figure S1.** Representation of the functional domains of the proteins PP2A (related to auxins), AHK4, and AHP1 (related to cytokinins). In each comparative pair, the functional domains for *A. thaliana* (At) and *P. pinaster* (Pp) are shown. (Meaning of the acronym used in the representation: lc = low complexity, tr = transmembrane region).

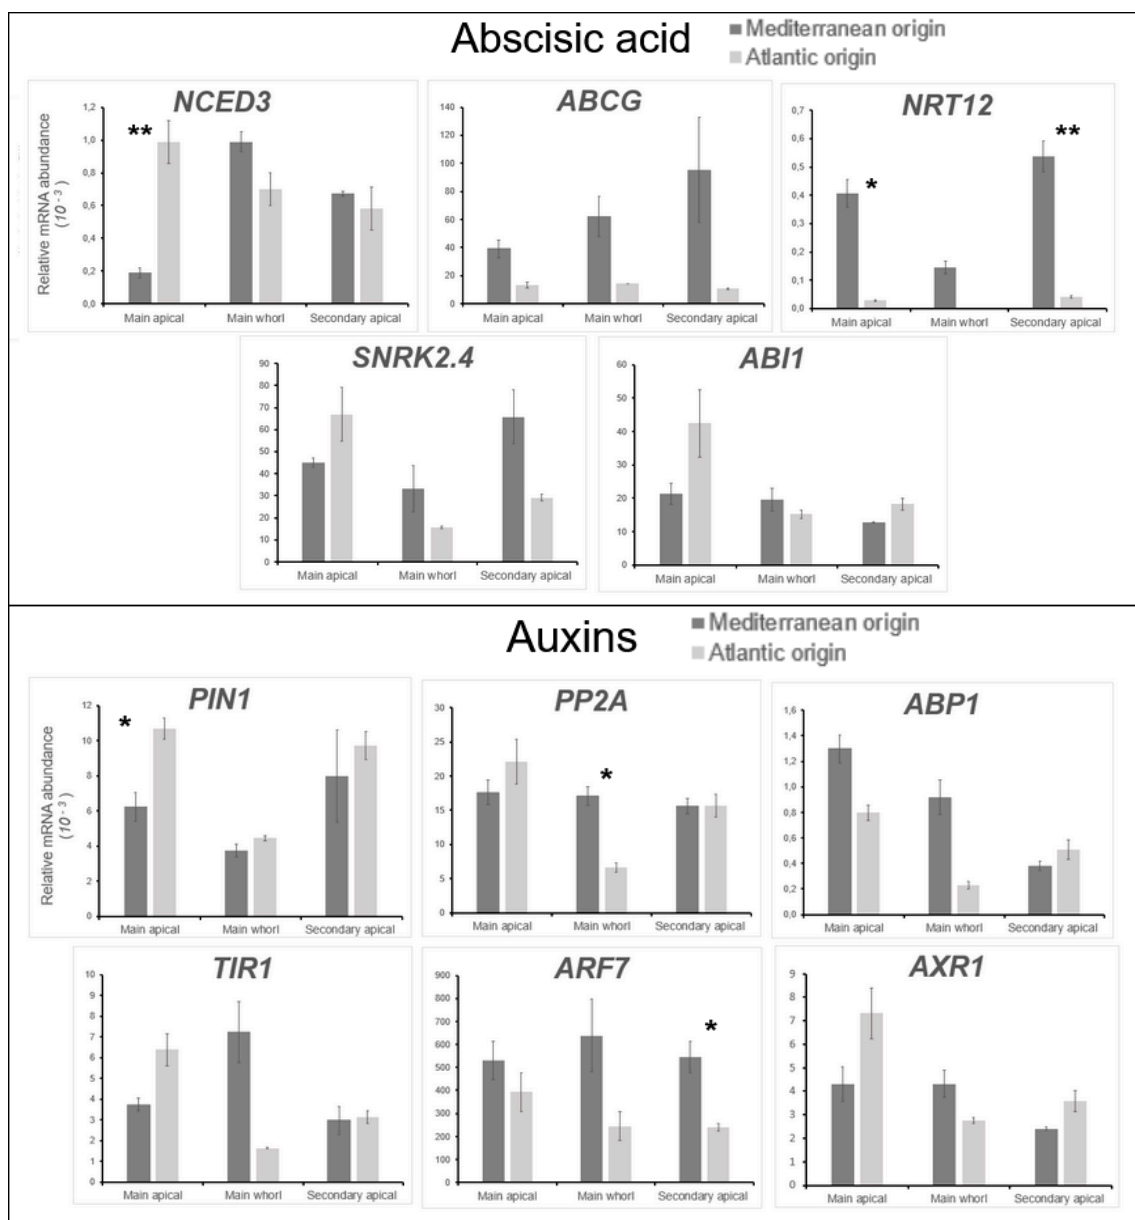

## Cytokinins

■ Mediterranean origin  
■ Atlantic origin

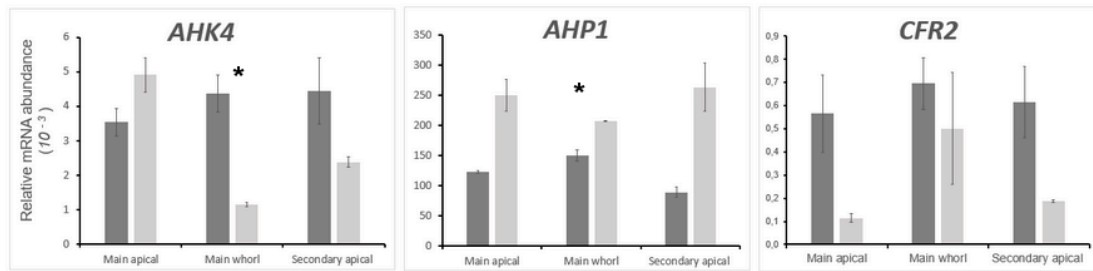

## Strigolactones

■ Mediterranean origin  
■ Atlantic origin

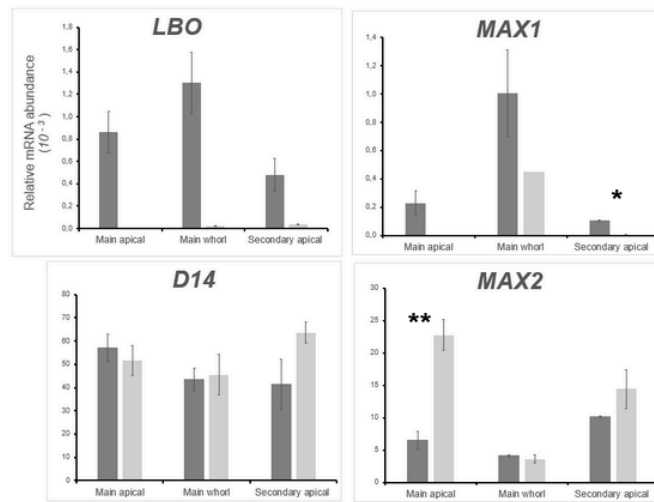

## Gibberellins

■ Mediterranean origin  
■ Atlantic origin

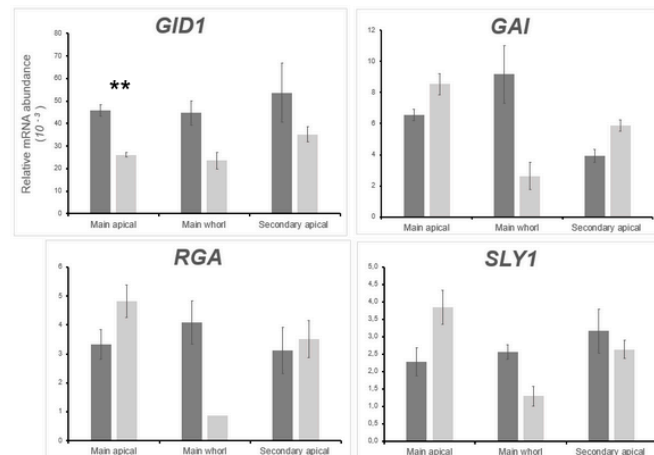

## Sugars

■ Mediterranean origin  
■ Atlantic origin

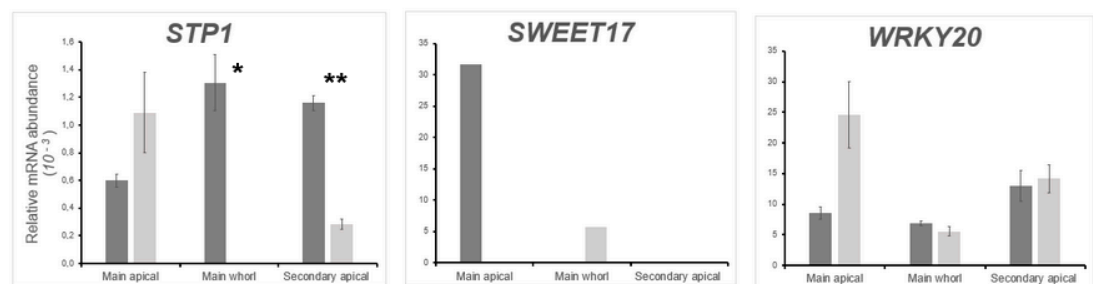

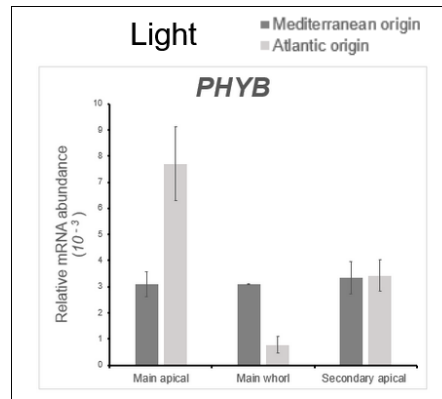

**Figure S2.** Relative gene expression analyzed by RT-qPCR in main apical buds, main whorls, and secondary apical buds for Atlantic and Mediterranean provenances classified according to the phytohormone or non-hormonal factor group. Two asterisks or one asterisk indicate significant differences in expression (based on a Student's *t*-test) with a confidence interval of 95% or 90%, respectively. (Data are represented as mean  $\pm$  standard error.)
